# Supplementary material
Source: Royal Society of Chemistry journal article supplement (doi:10.1039/d5fb00729a)
Supplement: d5fb00729a1.pdf [file d5fb00729a1.pdf]

## Valorisation of Tomato Pomace: Bioactive Compounds, Antimicrobial

### Activity and Photodynamic Inactivation

Raquel Nunes da Silva<sup>1,3\*#</sup>, Bárbara Maurício<sup>1,2#</sup>, Ana Fernandes<sup>1</sup>, Iva Fernandes<sup>1,3</sup>, Nuno Mateus<sup>1,3</sup>, Victor de Freitas<sup>1,3</sup>

<sup>1</sup> LAQV-REQUIMTE, Chemistry and Biochemistry Department, Faculty of Sciences, University of Porto, Rua do Campo Alegre 689, 4169-007 Porto, Portugal; raq.silva@fc.up.pt

<sup>2</sup> Faculty of Engineering, University of Porto, s/n, R. Dr. Roberto Frias, 4200-465 Porto, Portugal

<sup>3</sup> Chemistry and Biochemistry Department, Faculty of Sciences, University of Porto, Rua do Campo Alegre 689, 4169-007 Porto, Portugal

\*Corresponding author: raq.silva@fc.up.pt

#The author contributed equally to this work

## Supplementary Information

### 1.HPLC-DAD-ESI-MS/MS individual polyphenol quantification

**Table A.1.** Mass spectrophotometry polyphenol tentative identification. Concentration of polyphenols in mg of polyphenol equivalents (PE) per g of dry weight (DW). In white: catechin equivalents, maximum absorbance at 280nm; In blue: chlorogenic acid equivalents, maximum absorbance at 320nm; In purple: quercetin equivalents, maximum absorbance at 353 nm. rt: retention time, nd: not-determined, nd\*: not-detected

| Peak number | Wavelength | Tentative Identification | rt    | [M-H] <sup>-</sup> | MS/MS Fragments                   | ST     | HL     |
|-------------|------------|--------------------------|-------|--------------------|-----------------------------------|--------|--------|
| 1           | 280        | Cinnamic acid            | 4.18  | 193.24             | 130.87,113.03,89.02,174.89,148.89 | 0.0174 | 0.0070 |
| 2           | 320        | Chlorogenic acid         | 4.56  | 191.28             | 190.92,126.93,173,84.98           | 0.0040 | nd*    |
|             | 320        |                          | 4.62  | 191.23             | 126.94,173.84                     |        |        |
| 3           | 280        | Quinic acid              | 6.06  | 191.00             | 110.81,172.88                     | 0.0048 | nd*    |
| 4           | 280        | nd                       | 7.07  | 323.20             | 210.88, 279.89                    | 0.0509 | 0.0071 |
| 5           | 280        | nd                       | 8.37  | 243.02             | 199.96,110.91,151.96              | 0.0612 | 0.0483 |
| 6           | 280        | nd                       | 11.21 | 134.01             | 133.92,106.85                     | 0.0791 | 0.0770 |
| 7           | 280        | nd                       | 12.16 | 282.11             | 149.92,133                        | 0.1364 | 0.0863 |
| 8           | 280        | nd                       | 15.40 | 233.00             | 188.88                            | 0.0469 | 0.0363 |
| 9           |            |                          | 18.53 |                    |                                   | 0.0496 | 0.0155 |
| 10          | 280        | nd                       | 23.78 | 203.00             |                                   | 0.0693 | 0.0280 |
| 11          | 280        | <i>p</i> -coumaric acid  | 25.70 | 162.99             |                                   | 0.1162 | 0.0404 |

|    |     |                                   |       |         |                                    |        |        |
|----|-----|-----------------------------------|-------|---------|------------------------------------|--------|--------|
| 12 | 280 | Caffeic acid-hexose               | 26.07 | 341.18  |                                    | 0.0165 | 0.0222 |
| 13 | 280 | nd                                | 29.23 | 443.34  | 237.10,160.95,425.15,219.50,142.80 | 0.0480 | 0.0457 |
| 14 | 280 | Homovanillic acid-O hexoside      | 30.54 | 343.16  | 180.9,136.0                        | 0.0258 | 0.0147 |
| 15 | 280 | Coumaric acid-hexose              | 31.38 | 325.21  | 162.84                             | 0.2789 | 0.1095 |
| 16 | 353 | Rutin-O-hexoside-pentoside        | 32.63 | 903.27  | 741.20                             | 0.0110 | 0.0180 |
| 17 | 280 | Naringenin chalcone-dihexoside    | 34.48 | 595.23  | 355.07,475.05,385.16,505.16        | 0.1981 | 0.0774 |
| 18 | 353 | Rutin-O-hexoside                  | 35.31 | 771.33  | 609.12, 463.11,301.03              | 0.0999 | 0.0698 |
| 19 | 353 | Rutin-O-hexoside                  | 35.92 | 771.40  | 609.63,301,21,463.43,652.23        |        |        |
| 20 | 280 | Naringenin-O-glucoside (1)        | 39.15 | 433.22  | 271.00                             | 0.0258 | 0.0232 |
| 21 | 353 | Quercetin-3-galactoside           | 40.41 | 463.26  | 301.06                             | 0.0017 | nd*    |
| 22 | 280 | Eriodictyol-O-dihexoside          | 42.33 | 611.27  | 449.02                             | 0.0124 | 0.0092 |
| 23 | 280 | Naringenin-O-glucoside (2)        | 44.47 | 433.22  |                                    | 0.0163 | 0.0088 |
| 24 | 280 | Eriodictyol-7-O-glucoside         | 45.73 | 449.21  | 286.96                             | 0.0738 | 0.0787 |
| 25 | 280 | Naringenin-O-dihexoside           | 46.24 | 595.30  | 270.90                             | 0.0084 | 0.0154 |
| 26 | 353 | Rutin-O-pentoside                 | 48.48 | 741.60  | 300.32,609.21,591.27               | 0.1276 | 0.0946 |
| 27 | 280 | Phloretin-C-diglycoside           | 50.10 | 597.42  | 357.53,477.24                      | 0.0656 | 0.0401 |
| 28 | 353 | Quercetin derivative              | 50.57 | 1328.80 | 1268.67                            | 0.0161 | 0.0127 |
| 29 | 353 | Rutin                             | 51.77 | 609.97  | 300.92                             | 0.8636 | 1.1017 |
| 30 | 353 | Rutin derivative (1)              | 53.16 | 917.36  | 741.18, 723.26                     | nd*    | nd*    |
| 31 | 320 | Tricaffeoylquinic acid derivative | 53.50 | 713.78  | 677.47                             | 0.0023 | 0.0028 |
| 32 | 280 | Naringenin derivate               | 54.20 | 475.35  | 270.93                             | 0.0349 | 0.0171 |
| 33 | 320 | Tricaffeoylquinic acid derivative | 54.98 | 827.00  | 790.56                             | 0.0644 | 0.0740 |
| 34 | 353 | Rutin derivative (2)              | 55.56 | 921.45  | 741.19,877.24,723.22,609.27        | 0.0204 | 0.0094 |
| 35 | 280 | Naringenin Chalcone               | 57.67 | 271.32  | 151.08,271.05,272,177.05,165.01    | 0.2981 | 0.7108 |

## 2. HPLC-DAD polyphenols

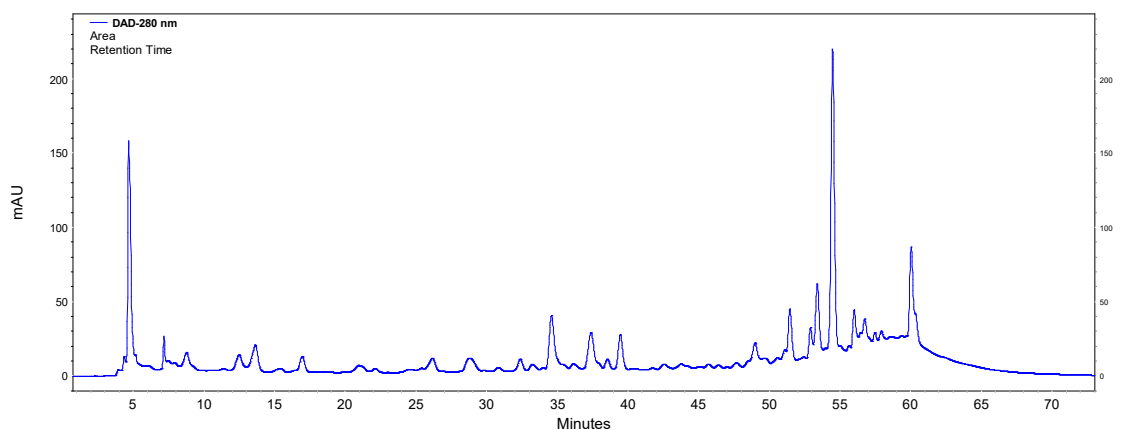

Figure A.1. Chromatogram HPLC-DAD of tomato pomace polyphenol extracts of ST variety at 280 nm.

### 3. HPLC-DAD carotenoids

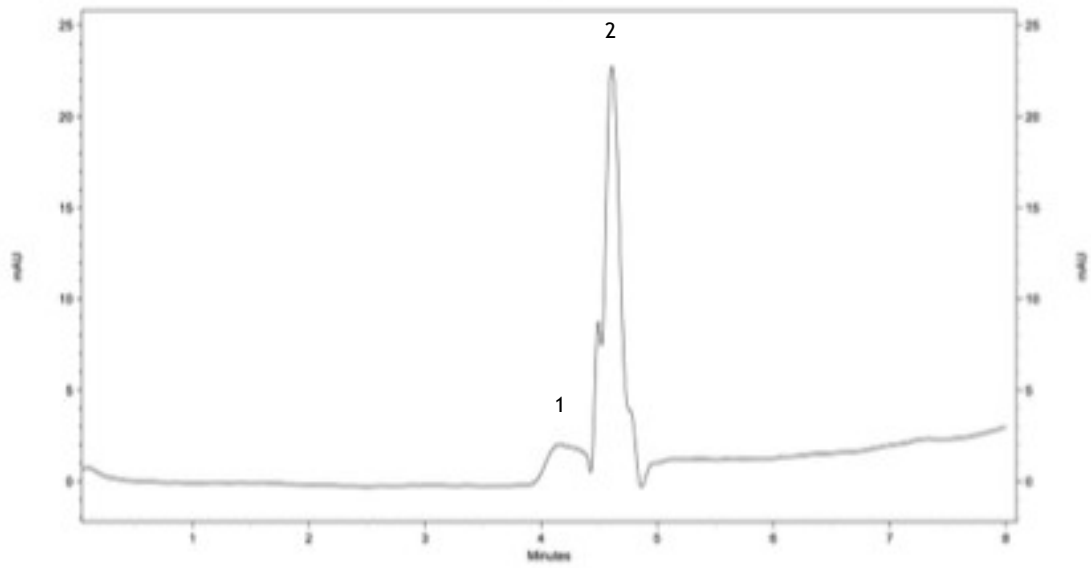

**Figure A.2.** Chromatogram HPLC-DAD of tomato pomace carotenoid extract from ST variety. 1.  $\beta$ -carotene, 2. Lycopene.

#### 4. Absorption spectrums of polyphenol and carotenoid extracts

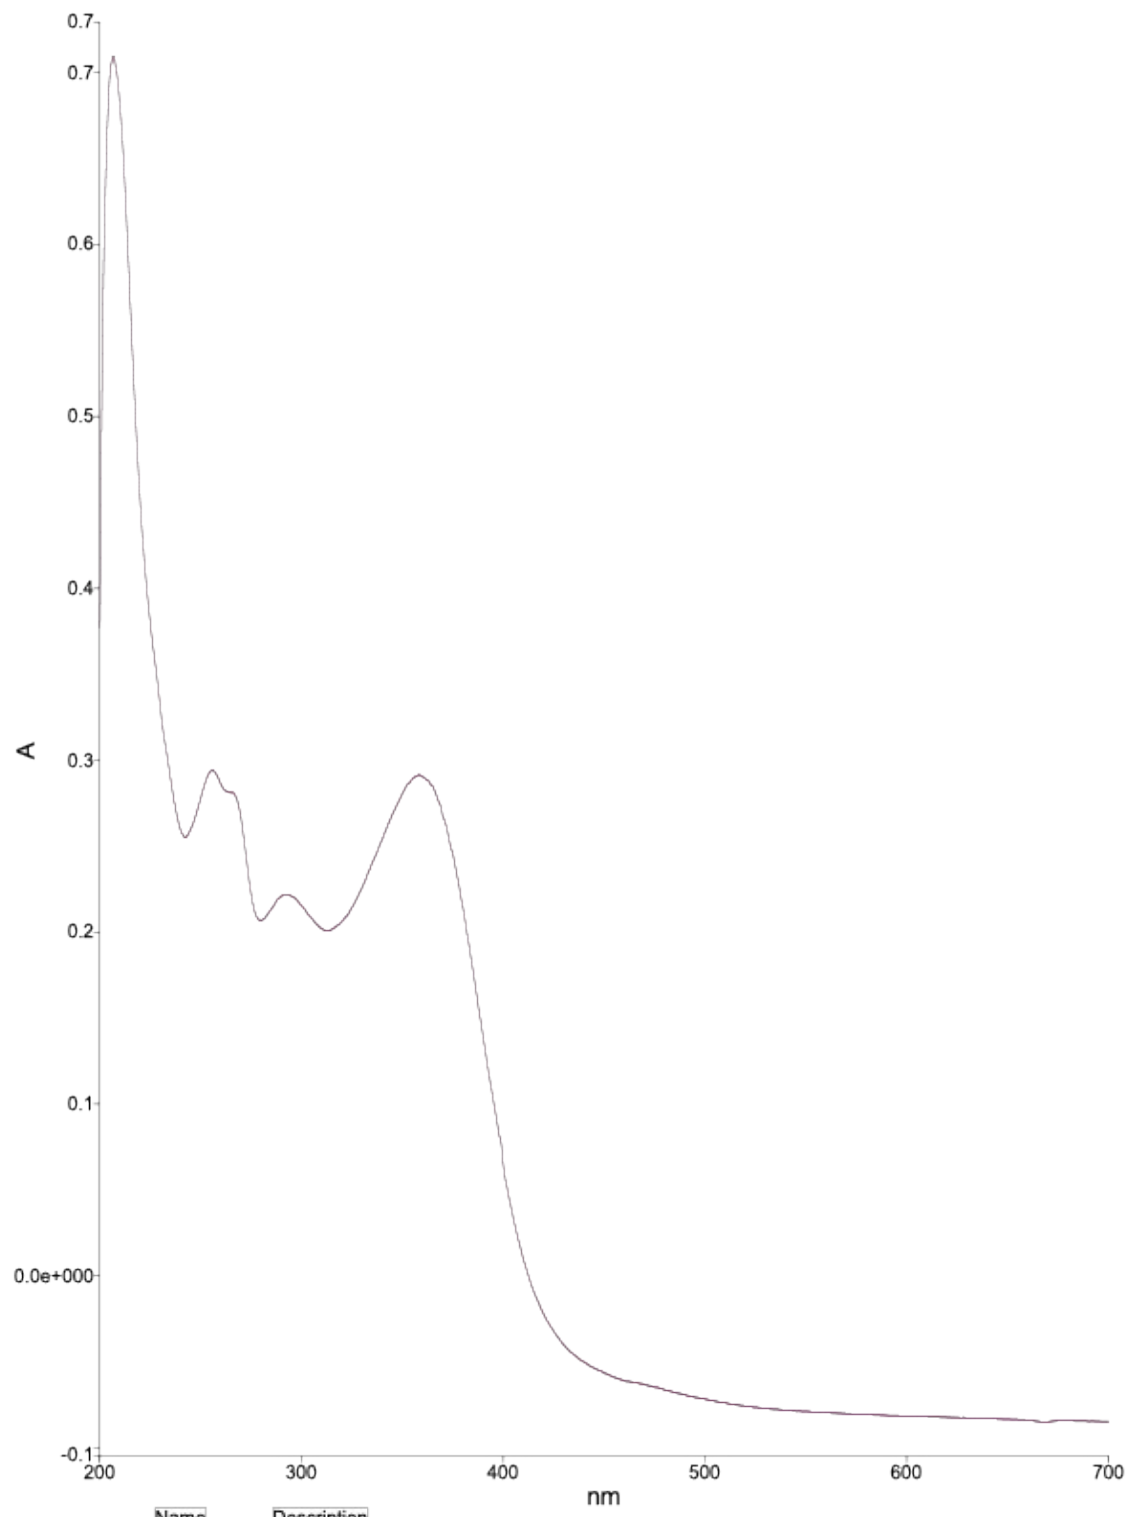

**Figure A.3.** Absorption spectrum of polyphenol extract of HL variety

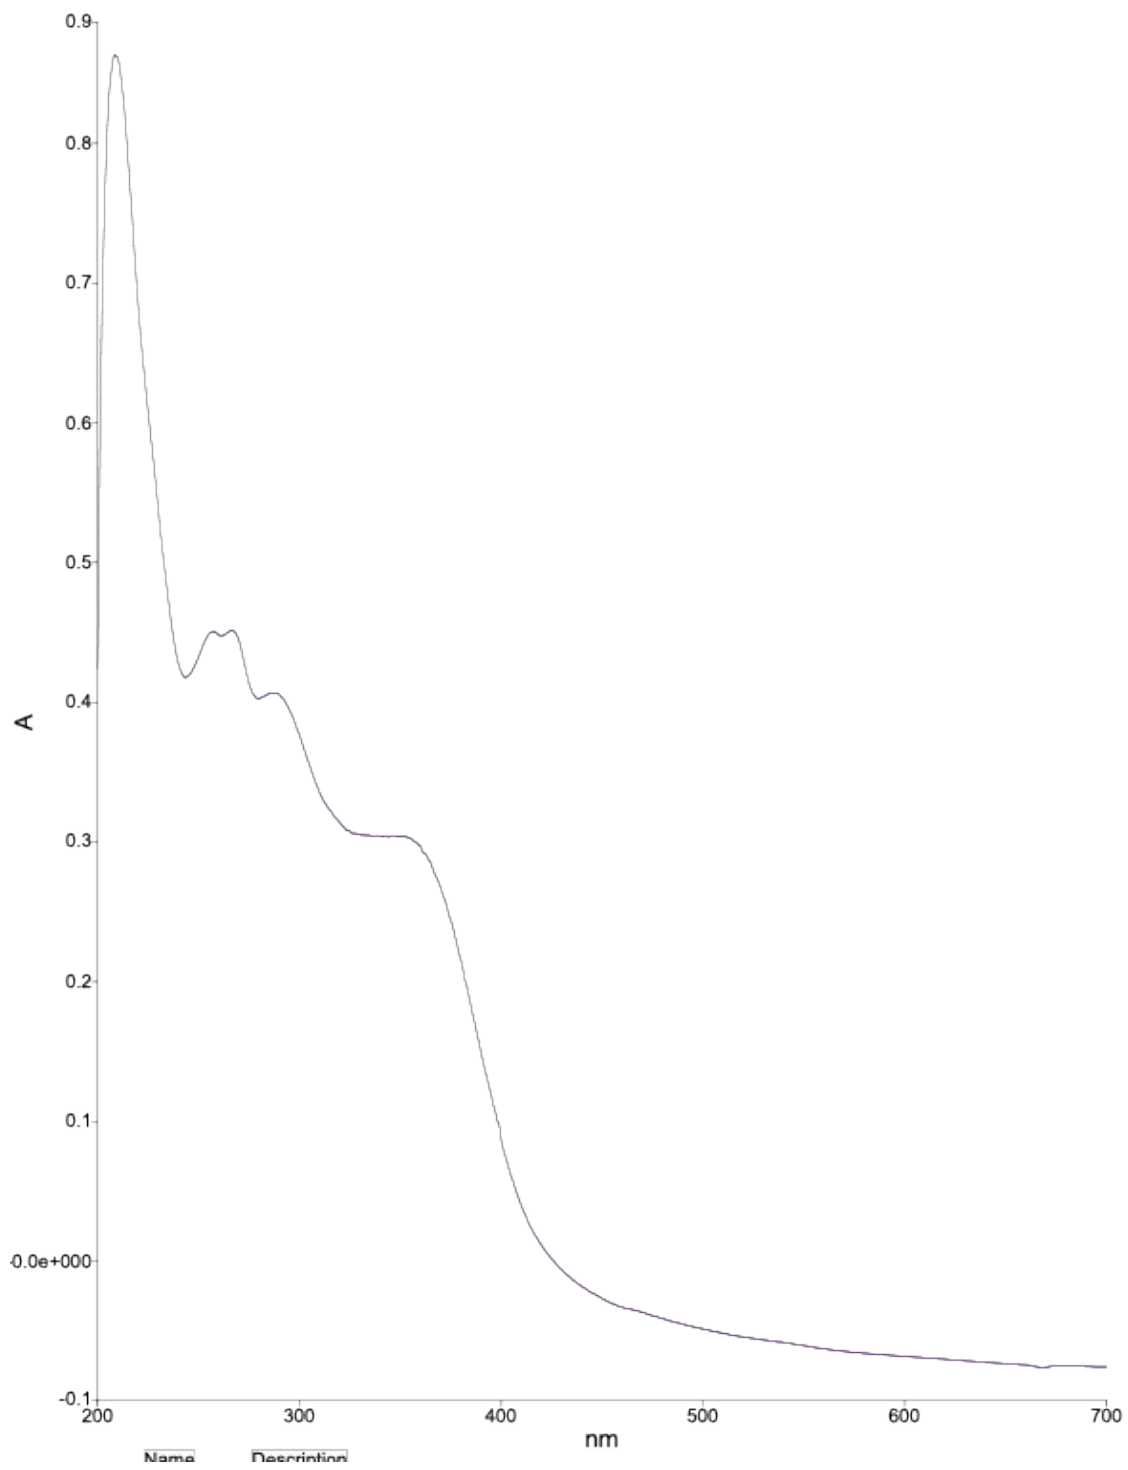

**Figure A.4.** Absorption spectrum of polyphenol extract of ST variety

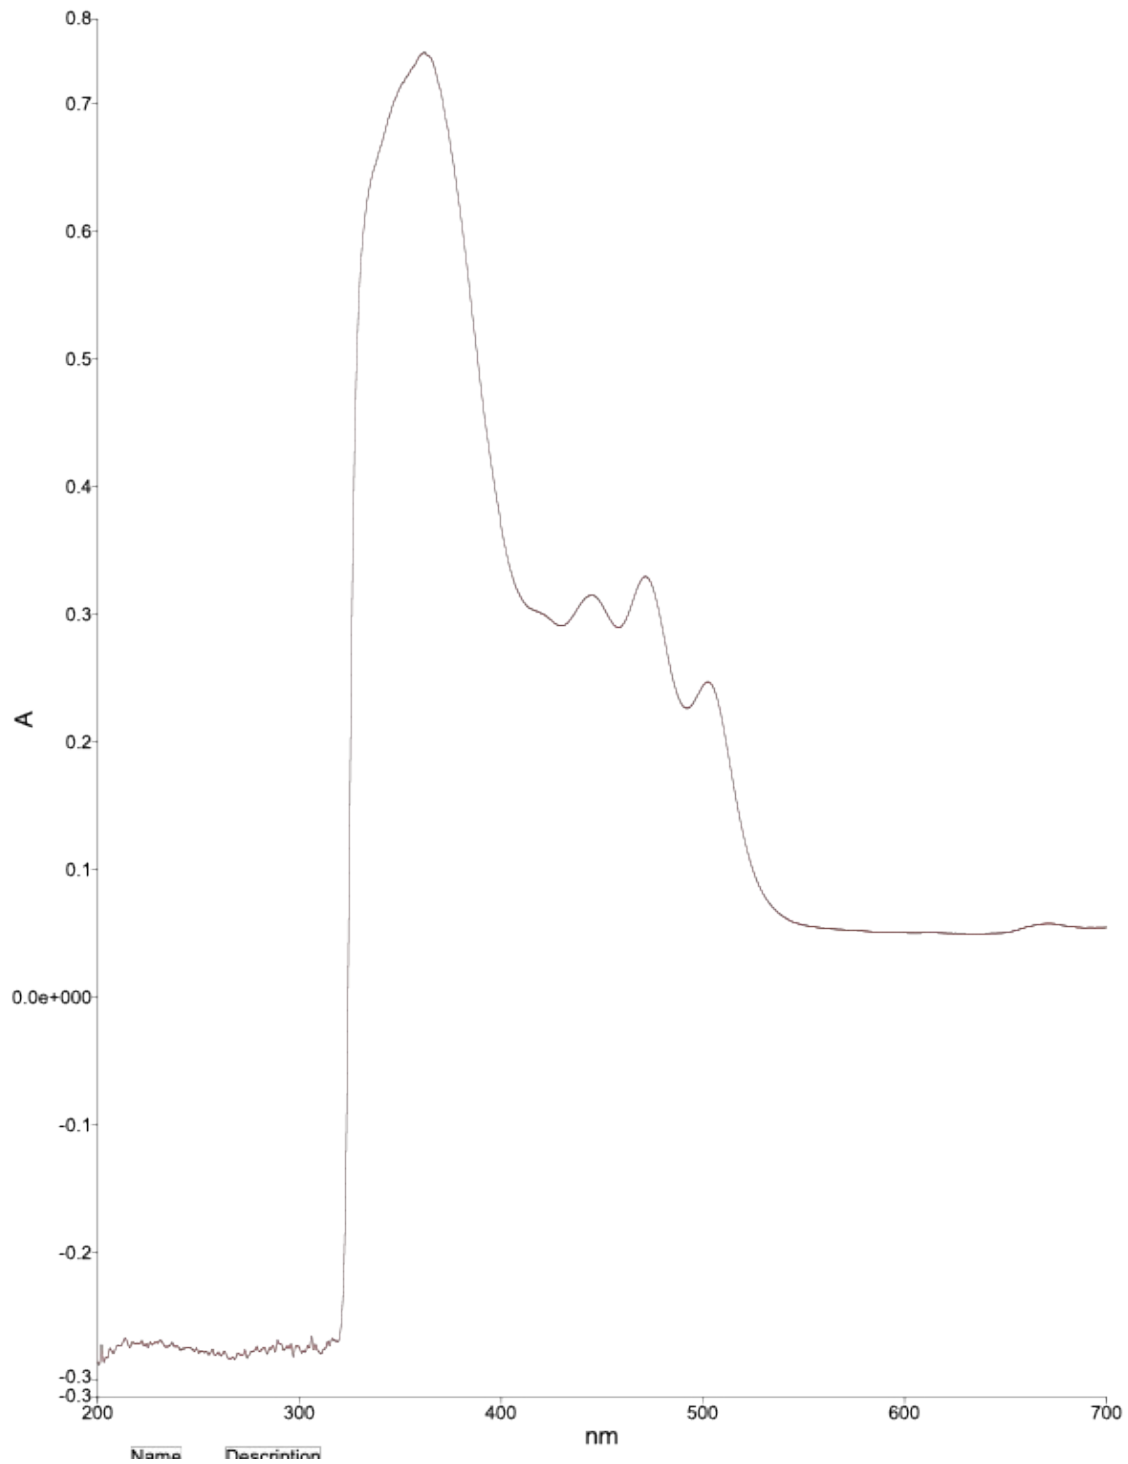

**Figure A.5.** Absorption spectrum of carotenoid extract of ST variety

Note: The negative absorbance values from 325nm and below are from the acetone present in the extraction solvent.

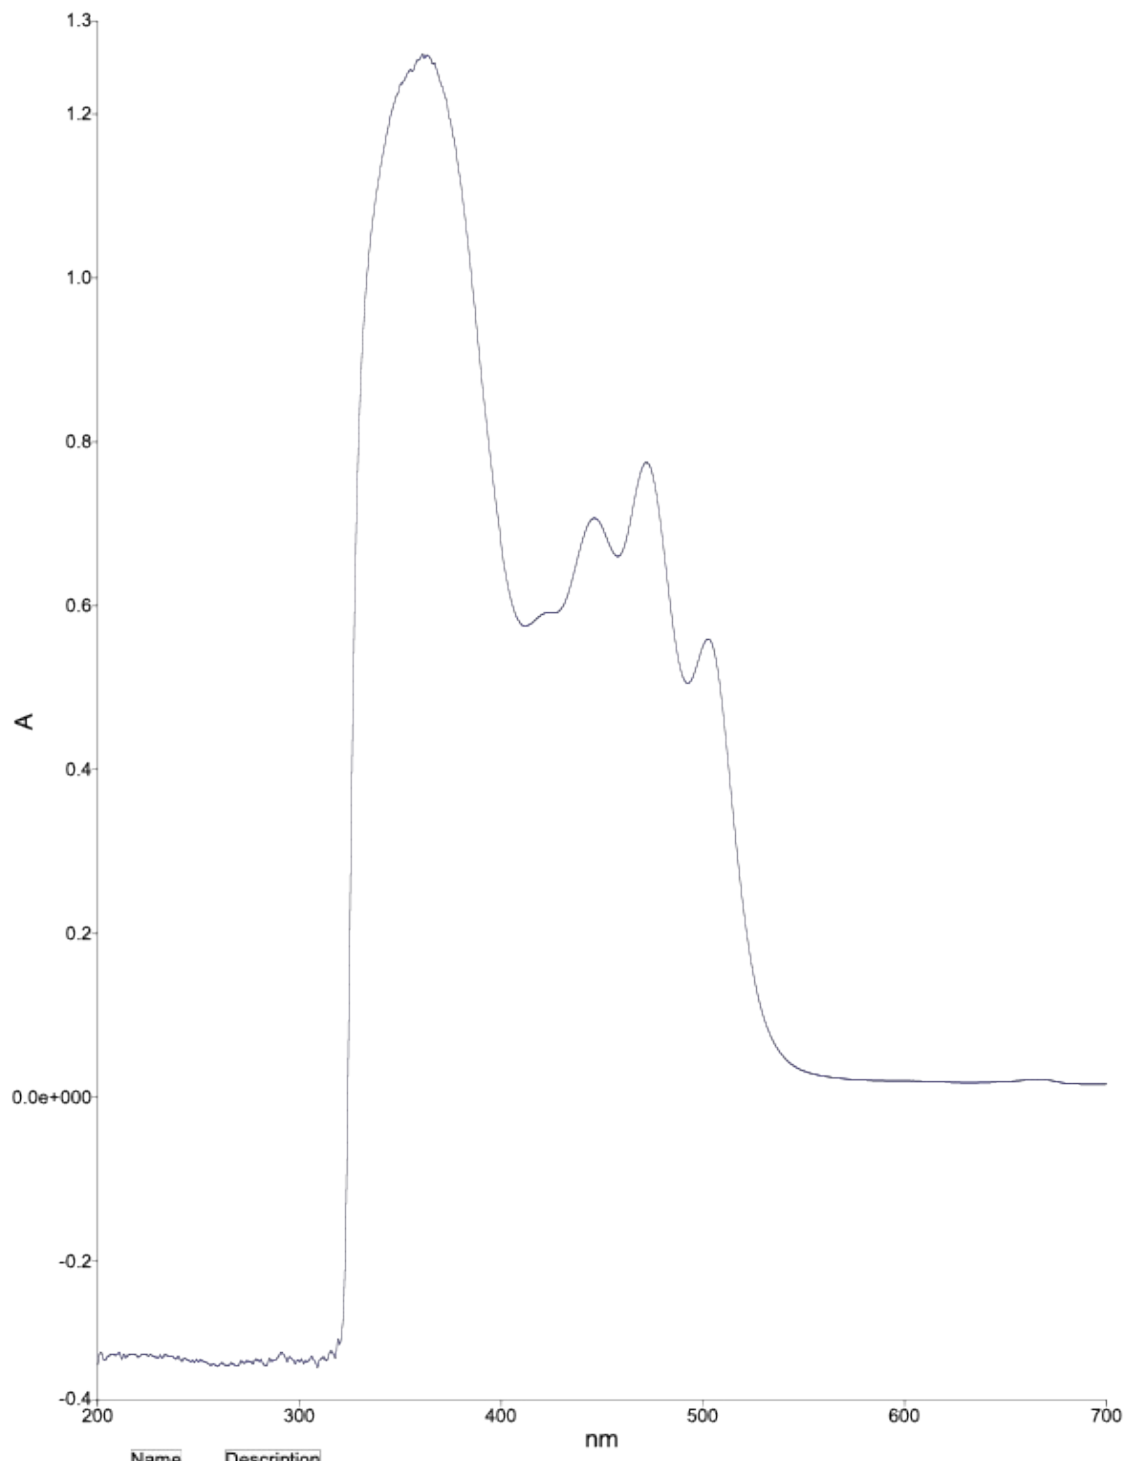

**Figure A.6.** Absorption spectrum of carotenoid extract of HL variety
